**Table S1. Ocular media transmittance in four species of raptor**

[Download Table S1](#)
